# Supplementary material
Source: PubMed Central journal article supplement (PMC2856133)

## **SUPPLEMENTAL MATERIALS**

### **METHODS**

#### **Primary cell culture**

NAc cells were obtained from postnatal day 1 rats and primary cultures prepared as described previously (Mangiavacchi & Wolf, 2004). After 2-3 weeks in vitro, cells were fixed (4% paraformaldehyde, 15 min), permeabilized (0.1% Triton X-100, 15 min), blocked with 5% donkey serum (60 min), incubated with antibody to either CRMP-2 (1:100, IBL America) or G<sub>αo</sub> (1:200; Santa Cruz Biotechnology) for 1 h at RT, and then incubated with Alexa-488 donkey anti-mouse secondary antibody (1:1000; Molecular Probes) to visualize CRMP-2 or a Cy3 donkey anti-rabbit secondary antibody (1:1000; Jackson Labs) to visualize G<sub>αo</sub>. Images were acquired with a Nikon inverted microscope, an ORCA-ER digital camera and MetaMorph software (Universal Imaging, Downingtown, PA).

## FIGURES

**Supplemental Figure 1.** Western blot of a 2-dimensional gel immunoprobed with antibody recognizing phosphorylated PKA substrates. **1A**, PKA substrate of 90kDa; **4A-H**, PKA substrate of 66kDa; **6A-B**, PKA substrate of 54kDa; **9A-D**, PKA substrate of 39kDa. The first dimension of isoelectric focusing [pI] is indicated along the top, and the second dimension of separating by mass is indicated by molecular weight standards shown on the right.

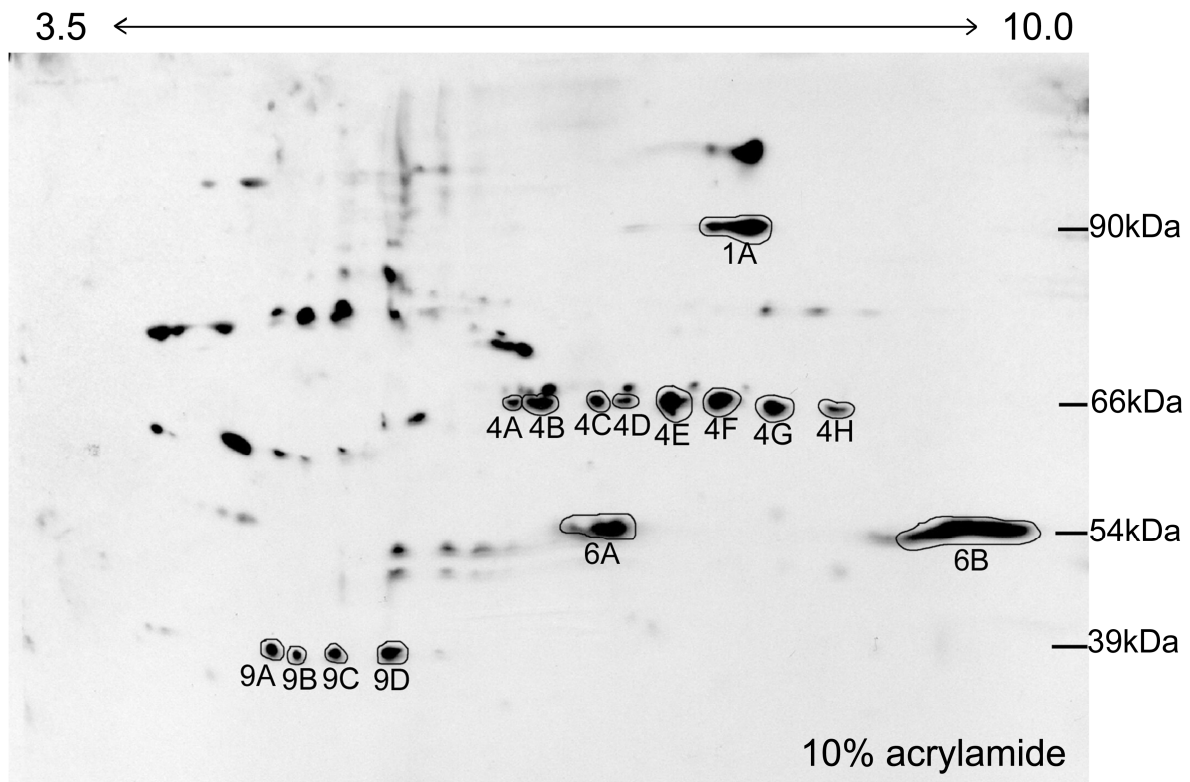

**Supplemental Figure 2.** Representative images of medium spiny neurons in primary cultures prepared from the postnatal rat NAc. Cultures were fixed prior to incubation with primary antibody and fluorescent secondary antibody. Both CRMP-2 (panel **A**) and  $G_{\alpha 2}$  (panel **B**) are expressed throughout the processes and in cell bodies of medium spiny neurons.

**A.**

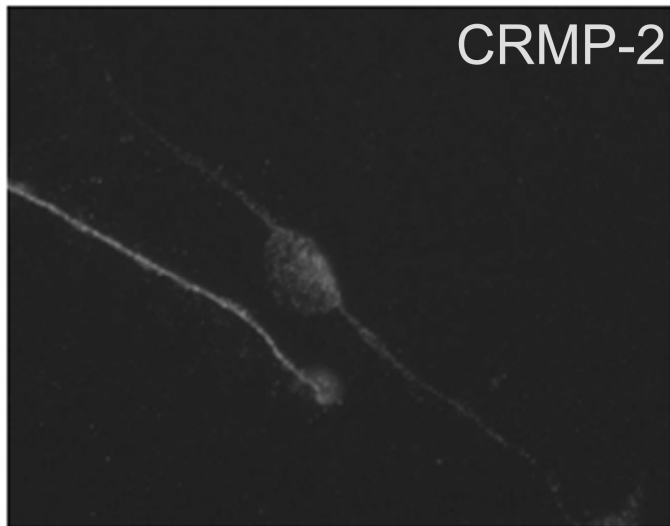

**B.**

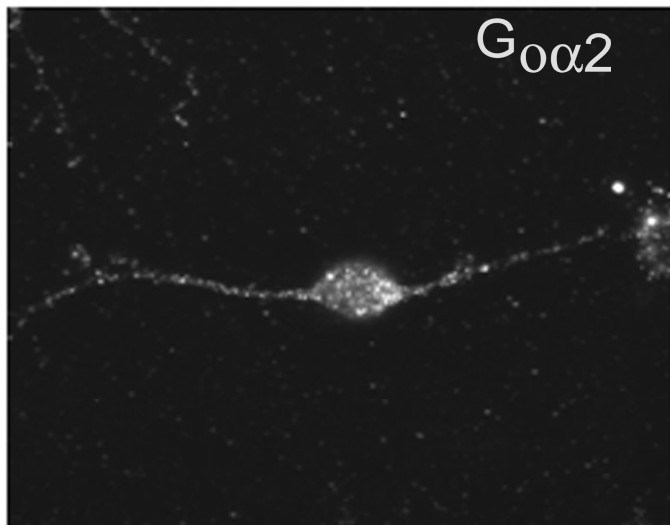

Supplement: NIHMS177369-supplement-Supp_Materials.pdf [file NIHMS177369-supplement-Supp_Materials.pdf]
